# Supplementary material for: CTCF promotes epithelial ovarian cancer metastasis by broadly controlling the expression of metastasis-associated genes
Source: PubMed Central journal article supplement (PMC5617499; doi:10.18632/oncotarget.19216), 2017-07-10
Supplement: oncotarget-08-62217-s001.pdf [file oncotarget-08-62217-s001.pdf]

# CTCF promotes epithelial ovarian cancer metastasis by broadly controlling the expression of metastasis-associated genes

## SUPPLEMENTARY MATERIALS

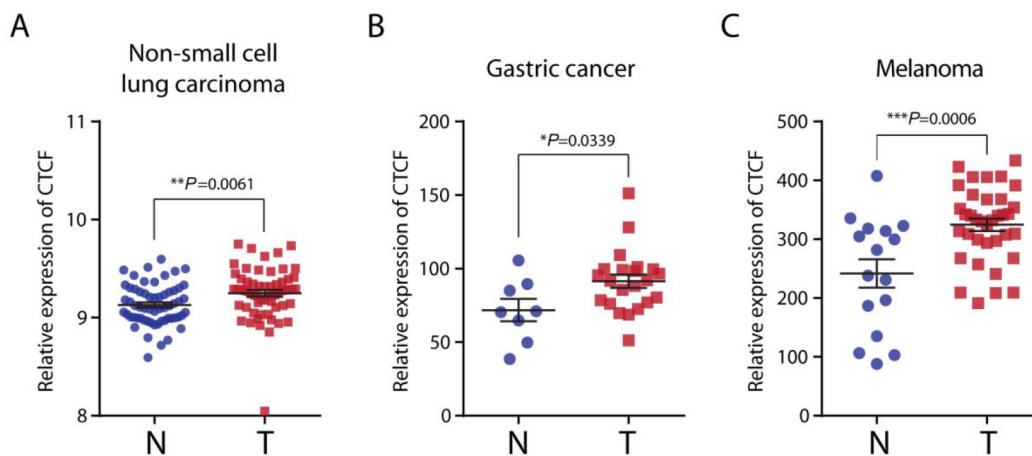

**Supplementary Figure 1: CTCF expression in other malignancies.** (A-C) CTCF mRNA expression was analyzed in Non-small cell lung carcinoma (A), gastric cancer (B) and melanoma (C) from GEO database (GSE19804, GSE2685 and GSE8401).

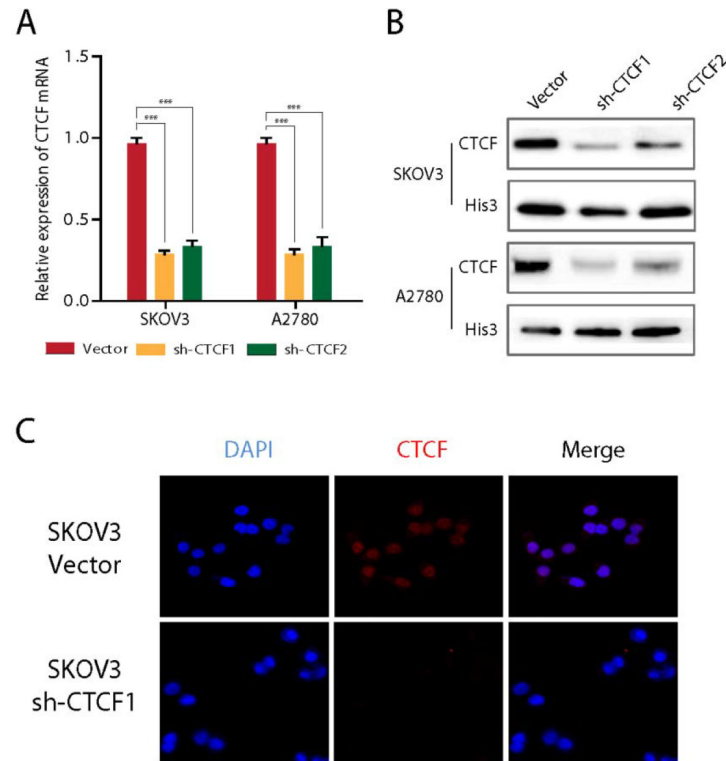

**Supplementary Figure 2: CTCF knockdown in ovarian cancer cells.** (A) CTCF mRNA expression in vector- or shCTCF-transfected SKOV3 and A2780 cells was evaluated using qPCR. (B) CTCF protein expression was assayed in vector- or shCTCF-transfected SKOV3 and A2780 cells. (C) Immunofluorescence staining of CTCF in vector- or shCTCF1-transfected SKOV3 cells.

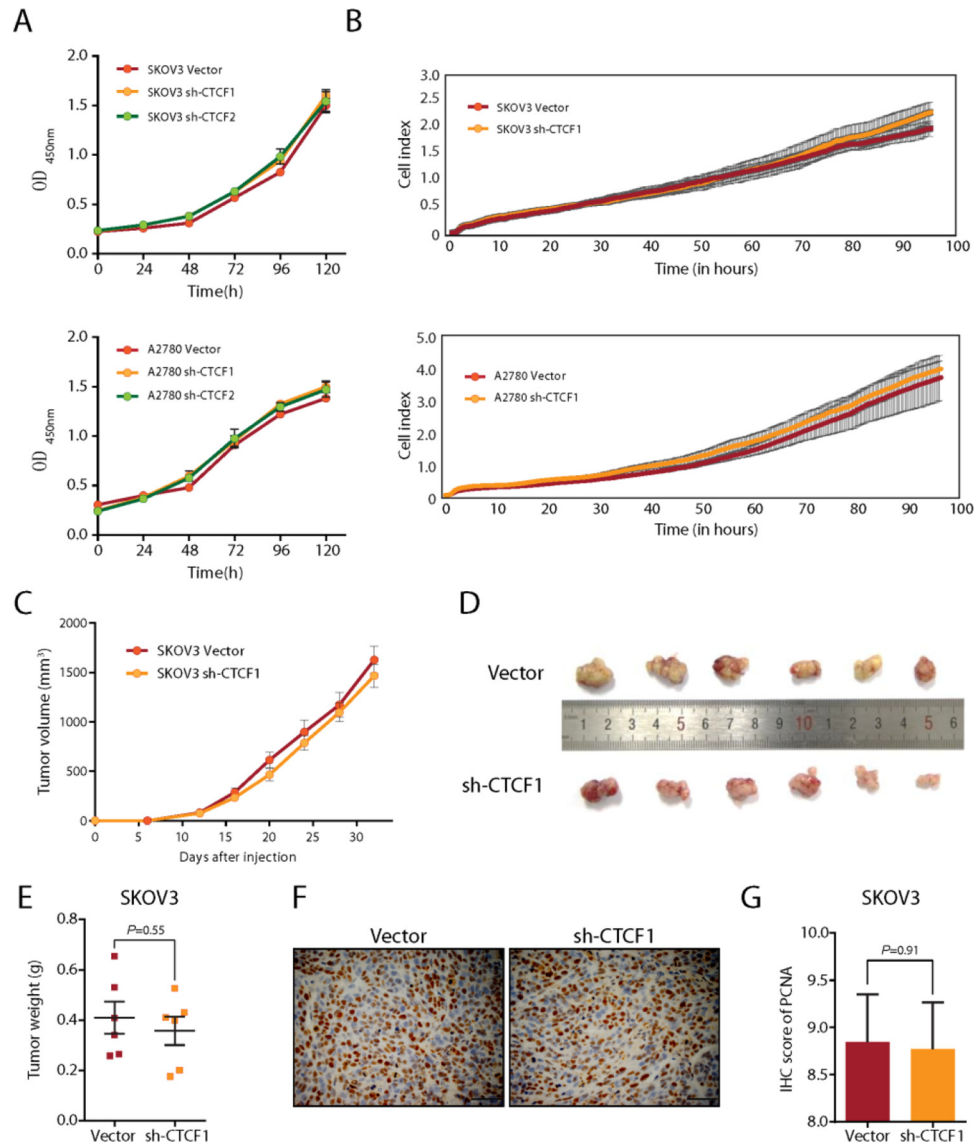

**Supplementary Figure 3: The effects of CTCF knockdown on ovarian cancer cell proliferation and tumor growth. (A)** Cell proliferation was evaluated using the CCK-8 assay in vector- or shCTCF-transfected SKOV3 and A2780 cells. **(B)** Cell proliferation was evaluated in vector- or shCTCF-transfected SKOV3 and A2780 cells using the xCELLigence RTCA system. **(C)** A total of  $1 \times 10^7$  vector- or shCTCF1-transfected SKOV3 cells were subcutaneously injected into each nude mouse, and the tumor growth was monitored. **(D)** Representative images of xenografted tumors on the day the mice were sacrificed. **(E)** Weights of xenografted tumors on the day the mice were sacrificed. **(F-G)** IHC staining for PCNA in xenografted tumors in the 2 groups.

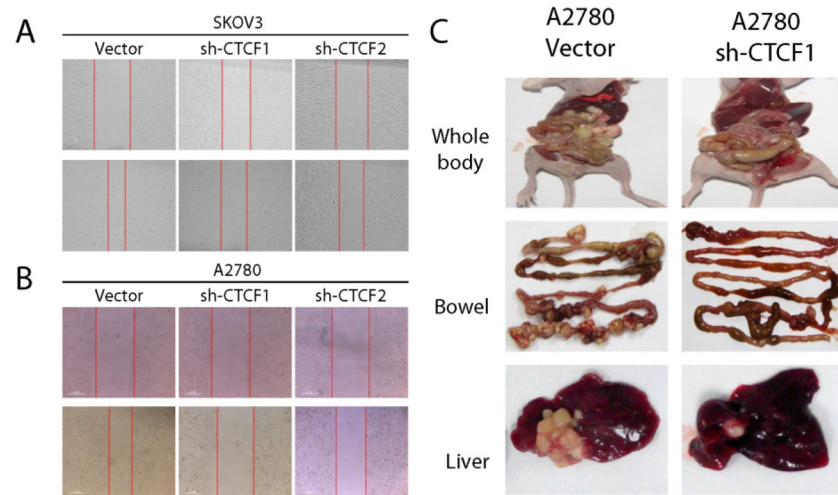

**Supplementary Figure 4: The effects of CTCF knockdown on ovarian cancer cell migration and tumor metastasis. (A-B)** Representative images of the wound healing assay results at 48 hours in vector- or sh-CTCF1 transfected SKOV3 (A) and A2780 cells (B) are shown. (C)  $1 \times 10^6$  vector- or shCTCF1-transfected A2780 cells were intraperitoneally injected into each nude mouse. Representative images of the abdominal cavity, bowel and liver of nude mice on the day they were sacrificed are shown.

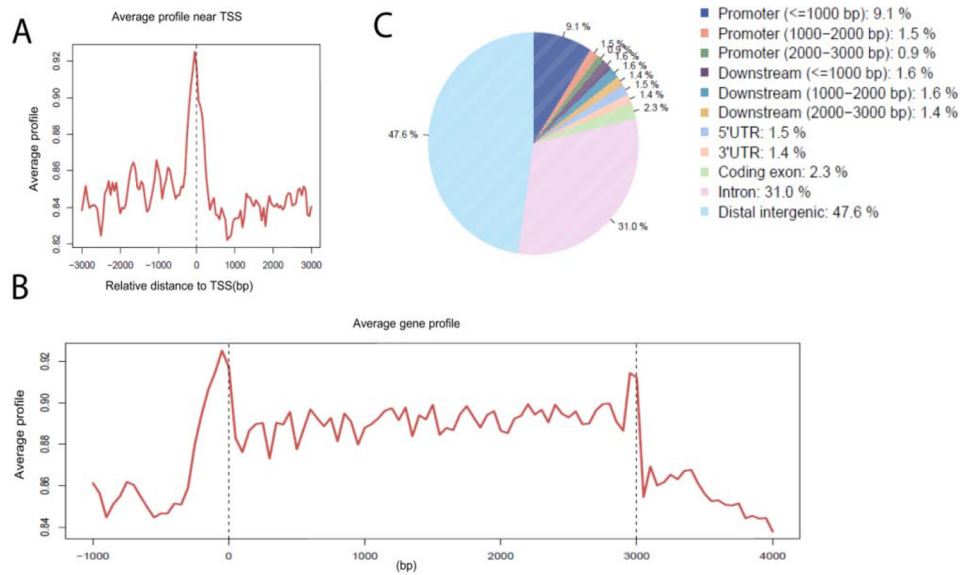

**Supplementary Figure 5: Identification of CTCF binding loci.** (A) The position of CTCF-binding sites with respect to the nearest TSS was plotted as a frequency distribution using 3-kb windows. (B) The distribution of the location of CTCF binding loci based on their relative to a closest known RefGene 5'TSS. (C) Genomic location of CTCF binding sites identified by ChIP-Seq.

**Supplementary Table 1: The information associated with the 20 patients with metastatic ovarian cancer from the study comparing CTCF expression between primary loci and metastatic loci (Figure 4)**

| No. | Histology    | Primary ovary loci | Metastatic loci | Analysis |
|-----|--------------|--------------------|-----------------|----------|
| 1   | Serous       | left               | lymph nodes     | WB, IHC  |
| 2   | Serous       | bilateral          | omentum         | WB, IHC  |
| 3   | Serous       | bilateral          | omentum         | WB, IHC  |
| 4   | Serous       | bilateral          | omentum         | WB, IHC  |
| 5   | Serous       | left               | lymph nodes     | WB, IHC  |
| 6   | clear cell   | bilateral          | omentum         | WB, IHC  |
| 7   | Serous       | right              | omentum         | WB, IHC  |
| 8   | Serous       | bilateral          | omentum         | WB, IHC  |
| 9   | Serous       | right              | omentum         | WB, IHC  |
| 10  | Endometrioid | bilateral          | omentum         | WB, IHC  |
| 11  | Serous       | left               | omentum         | WB, IHC  |
| 12  | Serous       | bilateral          | omentum         | WB, IHC  |
| 13  | Serous       | left               | omentum         | IHC      |
| 14  | Serous       | left               | omentum         | IHC      |
| 15  | Serous       | right              | omentum         | IHC      |
| 16  | Endometrioid | bilateral          | omentum         | IHC      |
| 17  | Serous       | left               | omentum         | IHC      |
| 18  | Serous       | bilateral          | omentum         | IHC      |
| 19  | Serous       | right              | omentum         | IHC      |
| 20  | Serous       | bilateral          | omentum         | IHC      |

**Supplementary Table 2: Differences in gene expression profiles related to tumor metastasis between the vector- and shCTCF-transfected SKOV3 and A2780 cells**

See Supplementary File 1

**Supplementary Table 3: The information associated with the 18 ovarian cancer patients from the study examining CTCF, SRC, CTBP1 and SERPINE1 expression (Figure 6B)**

| No | Age | Histology | Stage | Differentiaton |
|----|-----|-----------|-------|----------------|
| 1  | 58  | Serous    | II    | low            |
| 2  | 46  | Serous    | II    | high           |
| 3  | 48  | Serous    | III   | low            |
| 4  | 66  | Serous    | II    | high           |
| 5  | 53  | Serous    | IIIb  | low            |
| 6  | 43  | Serous    | IIIa  | low            |
| 7  | 53  | Serous    | IIIc  | low            |
| 8  | 46  | Serous    | IIIc  | high           |
| 9  | 41  | Serous    | II    | low            |
| 10 | 39  | Serous    | IIIb  | low            |
| 11 | 58  | Serous    | II    | low            |
| 12 | 64  | Serous    | IIIa  | medium         |
| 13 | 58  | Serous    | IIIc  | low            |
| 14 | 55  | Serous    | IIIb  | low            |
| 15 | 67  | Serous    | IIIc  | low            |
| 16 | 49  | Serous    | II    | medium         |
| 17 | 52  | Serous    | IIIa  | low            |
| 18 | 68  | Serous    | IIIa  | high           |



**Supplementary Table 4: A list of primers designed for ChIP-PCR**

| <b>Gene</b> | <b>Forward</b>      | <b>Reverse</b>        |
|-------------|---------------------|-----------------------|
| SRC         | GCCATAAAGCGAGGTCATA | AAGTGTGCCCTAAGTGTTG   |
| SERPINE1    | AAGGCTATTGGGGTTGCT  | GATGTGGGCAGGAAATAGATG |
| CTBP1       | ACACCCAAGGCCTCAG    | TCCTTTGTTACACAGAGTCAG |
